# Supplementary material for: Aluminum-Immobilizing Rhizobacteria Modulate Root Exudation and Nutrient Uptake and Increase Aluminum Tolerance of Pea Mutant E107 (brz)
Source: MDPI journal article supplement (doi:10.3390/plants12122334), 2023-06-15
Supplement: s1 [file s1]

SUPPLEMENTAL MATERIAL

**Table S1.** Growth of *Cupriavidus* sp. D39 in batch culture supplemented with various organic compounds as a sole sources of carbon or nitrogen.

| Substance        | Growth using a carbon source | Substance               | Growth using a carbon source | Growth using a nitrogen source |
|------------------|------------------------------|-------------------------|------------------------------|--------------------------------|
| Organic acids    |                              | Amino acids             |                              |                                |
| Acetate          | +++                          | $\gamma$ -Aminobutyrate | +++                          | +                              |
| Citrate          | +++                          | Alanine                 | +++                          | +                              |
| Fumarate         | +++                          | Arginine                | 0                            | +                              |
| Indole-3-acetate | ++                           | Asparaginate            | +++                          | +++                            |
| Lactate          | +++                          | Cysteine                | +                            | +                              |
| Malate           | +++                          | Glutamate               | +++                          | ++                             |
| Propionate       | +++                          | Glycine                 | +++                          | +                              |
| Pyruvate         | +++                          | Histidine               | +++                          | ++                             |
| Pyroglutamate    | +++                          | Isoleucine              | +++                          | +                              |
| Salicylate       | +++                          | Leucine                 | +++                          | +                              |
| Succinate        | +++                          | Lysine                  | ++                           | +                              |
| Sugars           |                              | Methionine              | 0                            | +                              |
| Arabinose        | ++                           | Ornithine               | +                            | +                              |
| Fructose         | +++                          | Phenylalanine           | +++                          | +                              |
| Glucose          | ++                           | Proline                 | +++                          | +                              |
| Ribose           | ++                           | Serine                  | ++                           | +                              |
| Sucrose          | ++                           | Threonine               | +++                          | +                              |
|                  |                              | Tyrosine                | +++                          | +                              |
|                  |                              | Tryptophane             | +++                          | ++                             |
|                  |                              | Valine                  | ++                           | +                              |

Note: 0, no growth; +, weak growth; ++, good growth; +++, abundant growth.

**Table S2.** The amount of amino acids ( $\mu\text{g g}^{-1}$  root dry weight) exuded by roots of cultivar Sparkle and E107 (*brz*) mutant inoculated with *Cupriavidus* sp. DG39 and treated with 80  $\mu\text{M}$   $\text{AlCl}_3$ .

| Pea genotype and treatment                    | Alanine          | Aspartic acid    | Glutamic acid     | Ornithine         | Valine        |
|-----------------------------------------------|------------------|------------------|-------------------|-------------------|---------------|
| Sparkle                                       |                  |                  |                   |                   |               |
| Control                                       | 9.4 $\pm$ 3.1 c  | 16.0 $\pm$ 2.1 b | 7.2 $\pm$ 3.0 a   | 0.05 $\pm$ 0.02 a | 42 $\pm$ 8 b  |
| <i>Cupriavidus</i> sp. DG39                   | 3.0 $\pm$ 2.4 ab | 1.6 $\pm$ 0.5 a  | 6.0 $\pm$ 0.5 a   | 0.01 $\pm$ 0.01 a | nd            |
| $\text{AlCl}_3$                               | 2.4 $\pm$ 0.6 ab | 2.7 $\pm$ 0.3 a  | 1.5 $\pm$ 0.3 a   | 0.03 $\pm$ 0.02 a | 8 $\pm$ 2 a   |
| <i>Cupriavidus</i> sp. DG39 + $\text{AlCl}_3$ | 0.7 $\pm$ 0.2 a  | 1.2 $\pm$ 0.2 a  | 7.7 $\pm$ 1.5 a   | 0.05 $\pm$ 0.01 a | nd            |
| E107 ( <i>brz</i> )                           |                  |                  |                   |                   |               |
| Control                                       | 25.6 $\pm$ 4.6 d | 14.5 $\pm$ 3.5 b | 43.7 $\pm$ 7.1 b  | 0.08 $\pm$ 0.02 a | 91 $\pm$ 28 c |
| <i>Cupriavidus</i> sp. DG39                   | 0.2 $\pm$ 0.1 a  | 1.1 $\pm$ 0.1 a  | 2.1 $\pm$ 0.2 a   | 0.07 $\pm$ 0.03 a | nd            |
| $\text{AlCl}_3$                               | 6.6 $\pm$ 2.0 bc | 21.4 $\pm$ 5.8 b | 46.0 $\pm$ 11.9 b | 0.21 $\pm$ 0.06 b | 54 $\pm$ 16 b |
| <i>Cupriavidus</i> sp. DG39 + $\text{AlCl}_3$ | 0.2 $\pm$ 0.1 a  | 0.7 $\pm$ 0.3 a  | 3.1 $\pm$ 1.7 a   | 0.07 $\pm$ 0.03 a | nd            |

Note: Different lowercase letters show significant differences between treatments (least significant difference test,  $p < 0.05$ ,  $n = 3$ ). nd stands for not detected.
